# Supplementary material
Source: HighWire-hosted journal article supplement (https://erj.ersjournals.com/content/56/4/2001727)
Supplement: inline-supplementary-material-1 [file inline-supplementary-material-1.pdf]

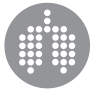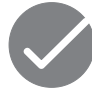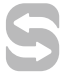

SHAREABLE PDF

# Epidemic and pandemic viral infections: impact on tuberculosis and the lung

**A consensus by the World Association for Infectious Diseases and Immunological Disorders (WAidid), Global Tuberculosis Network (GTN), and members of the European Society of Clinical Microbiology and Infectious Diseases Study Group for Mycobacterial Infections (ESGMYC)**

Catherine Wei Min Ong <sup>1,2,42,43</sup>, Giovanni Battista Migliori <sup>3,42</sup>, Mario Raviglione<sup>4,5</sup>, Gavin MacGregor-Skinner<sup>6</sup>, Giovanni Sotgiu <sup>7</sup>, Jan-Willem Alffenaar<sup>8,9,10,43</sup>, Simon Tiberi <sup>11,12,43</sup>, Cornelia Adlhoc <sup>13,44</sup>, Tonino Alonzi<sup>14</sup>, Sophia Archuleta<sup>1</sup>, Sergio Brusin<sup>13,44</sup>, Emmanuelle Cambau<sup>15,43</sup>, Maria Rosaria Capobianchi<sup>16</sup>, Concetta Castilletti<sup>16</sup>, Rosella Centis <sup>3</sup>, Daniela M. Cirillo <sup>17,43</sup>, Lia D'Ambrosio <sup>18</sup>, Giovanni Delogu<sup>19,20,43</sup>, Susanna M.R. Esposito<sup>21</sup>, Jose Figueroa<sup>22</sup>, Jon S. Friedland <sup>23,43</sup>, Benjamin Choon Heng Ho <sup>24</sup>, Giuseppe Ippolito<sup>25</sup>, Mateja Jankovic <sup>26,43</sup>, Hannah Yejin Kim<sup>8,9,10</sup>, Senia Rosales Klintz<sup>13,44</sup>, Csaba Ködmön<sup>13,44</sup>, Eleonora Lalle<sup>16</sup>, Yee Sin Leo<sup>27</sup>, Chi-Chiu Leung<sup>28</sup>, Anne-Grete Mårtson <sup>29</sup>, Mario Giovanni Melazzini<sup>30</sup>, Saeid Najafi Fard<sup>14</sup>, Pasi Penttinen <sup>13,44</sup>, Linda Petrone<sup>14</sup>, Elisa Petruccioli<sup>14</sup>, Emanuele Pontali<sup>31</sup>, Laura Saderi <sup>7</sup>, Miguel Santin <sup>32,33,43</sup>, Antonio Spanevello<sup>34,35</sup>, Reinout van Crevel<sup>36,37,43</sup>, Marieke J. van der Werf <sup>13,44</sup>, Dina Visca <sup>34,35</sup>, Miguel Viveiros<sup>38,43</sup>, Jean-Pierre Zellweger<sup>39</sup>, Alimuddin Zumla<sup>40</sup> and Delia Goletti<sup>14,41,43</sup>

 @ERSpublications

**This consensus statement describes the effects of the viral infections resulting in epidemics and pandemics affecting the lung (MERS, SARS, HIV, influenza A (H1N1)pdm/09 and COVID-19) and their interactions with TB, the top infectious disease killer** <https://bit.ly/2UUjhGu>

**Cite this article as:** Ong CWM, Migliori GB, Raviglione M, *et al.* Epidemic and pandemic viral infections: impact on tuberculosis and the lung. *Eur Respir J* 2020; 56: 2001727 [<https://doi.org/10.1183/13993003.01727-2020>].

This single-page version can be shared freely online.

**ABSTRACT** Major epidemics, including some that qualify as pandemics, such as severe acute respiratory syndrome (SARS), Middle East respiratory syndrome (MERS), HIV, influenza A (H1N1)pdm/09 and most recently COVID-19, affect the lung. Tuberculosis (TB) remains the top infectious disease killer, but apart from syndemic TB/HIV little is known regarding the interaction of viral epidemics and pandemics with TB. The aim of this consensus-based document is to describe the effects of viral infections resulting in epidemics and pandemics that affect the lung (MERS, SARS, HIV, influenza A (H1N1)pdm/09 and COVID-19) and their interactions with TB. A search of the scientific literature was performed. A writing committee of international experts including the European Centre for Disease Prevention and Control Public Health Emergency (ECDC PHE) team, the World Association for Infectious Diseases and Immunological Disorders (WAidid), the Global Tuberculosis Network (GTN), and members of the European Society of Clinical Microbiology and Infectious Diseases (ESCMID) Study Group for Mycobacterial Infections (ESGMYC) was established. Consensus was achieved after multiple rounds of revisions between the writing committee and a larger expert group. A Delphi process involving the core group of authors (excluding the ECDC PHE team) identified the areas requiring review/consensus, followed by a second round to refine the definitive consensus elements. The epidemiology and immunology of these viral infections and their interactions with TB are discussed with implications for diagnosis, treatment and prevention of airborne infections (infection control, viral containment and workplace safety). This consensus document represents a rapid and comprehensive summary on what is known on the topic.

**Affiliations:** <sup>1</sup>Dept of Medicine, Yong Loo Lin School of Medicine, National University of Singapore, Singapore. <sup>2</sup>Institute for Health Innovation and Technology (iHealthtech), National University of Singapore, Singapore. <sup>3</sup>Servizio di Epidemiologia Clinica delle Malattie Respiratorie, Istituti Clinici Scientifici Maugeri IRCCS, Tradate, Italy. <sup>4</sup>Centre for Multidisciplinary Research in Health Science, University of Milan, Milan, Italy. <sup>5</sup>Global Studies Institute, University of Geneva, Geneva, Switzerland. <sup>6</sup>Dept of Public Health Sciences, Penn State College of Medicine, Hershey, PA, USA. <sup>7</sup>Clinical Epidemiology and Medical Statistics Unit, Dept of Medical, Surgical and Experimental Sciences, University of Sassari, Sassari, Italy. <sup>8</sup>Sydney Pharmacy School, University of Sydney, Sydney, Australia. <sup>9</sup>Westmead Hospital, Sydney, Australia. <sup>10</sup>Marie Bashir Institute of Infectious Diseases and Biosecurity, University of Sydney, Sydney, Australia. <sup>11</sup>Blizard Institute, Barts and The London School of Medicine and Dentistry, Queen Mary University of London, London, UK. <sup>12</sup>Division of Infection, Royal London Hospital, Barts Health NHS Trust, London, UK. <sup>13</sup>Public Health Emergency Team, European Centre for Disease Prevention and Control, Stockholm, Sweden. <sup>14</sup>Translational Research Unit, Epidemiology and Preclinical Research Dept, "L. Spallanzani" National Institute for Infectious Diseases (INMI), IRCCS, Rome, Italy. <sup>15</sup>AP-HP-Lariboisiere, Bacteriologie, Laboratory Associated to the National Reference Centre for Mycobacteria, IAME UMR1137, INSERM, University of Paris, Paris, France. <sup>16</sup>Laboratory of Virology, Epidemiology and Preclinical Research Dept, "L. Spallanzani" National Institute for Infectious Diseases (INMI), IRCCS, Rome, Italy. <sup>17</sup>Emerging Bacterial Pathogens Unit, IRCCS San Raffaele Scientific Institute, Milan, Italy. <sup>18</sup>Public Health Consulting Group, Lugano, Switzerland. <sup>19</sup>Università Cattolica Sacro Cuore, Roma, Italy. <sup>20</sup>Mater Olbia Hospital, Olbia, Italy. <sup>21</sup>Pediatric Clinic, Pietro Barilla Children's Hospital, University of Parma, Parma, Italy. <sup>22</sup>National Health Service, London, UK. <sup>23</sup>St George's, University of London, London, UK. <sup>24</sup>Tuberculosis Control Unit, Dept of Respiratory and Critical Care Medicine, Tan Tock Seng Hospital, Singapore. <sup>25</sup>Scientific Direction, "L. Spallanzani" National Institute for Infectious Diseases (INMI), IRCCS, Rome, Italy. <sup>26</sup>School of Medicine, University of Zagreb and Clinic for Respiratory Diseases, University Hospital Center Zagreb, Zagreb, Croatia. <sup>27</sup>National Centre for Infectious Diseases, Singapore. <sup>28</sup>Hong Kong Tuberculosis, Chest and Heart Diseases Association, Wanchai, Hong Kong, China. <sup>29</sup>Dept of Clinical Pharmacy and Pharmacology, University Medical Center Groningen, University of Groningen, Groningen, The Netherlands. <sup>30</sup>Scientific Direction, Istituti Clinici Scientifici Maugeri IRCCS, Pavia, Italy. <sup>31</sup>Dept of Infectious Diseases, Galliera Hospital, Genova, Italy. <sup>32</sup>Dept of Infectious Diseases, Bellvitge University Hospital-Bellvitge Biomedical Research Institute (IDIBELL), L'Hospitalet de Llobregat, Barcelona, Spain. <sup>33</sup>Dept of Clinical Science, University of Barcelona, L'Hospitalet de Llobregat, Barcelona, Spain. <sup>34</sup>Division of Pulmonary Rehabilitation, Istituti Clinici Scientifici Maugeri, IRCCS, Tradate, Italy. <sup>35</sup>Dept of Medicine and Surgery, Respiratory Diseases, University of Insubria, Varese-Como, Italy. <sup>36</sup>Radboudumc Center for Infectious Diseases, Radboud Institute for Health Sciences, Radboudumc, Nijmegen, The Netherlands. <sup>37</sup>Centre for Tropical Medicine and Global Health, Nuffield Dept of Medicine, University of Oxford, Oxford, UK. <sup>38</sup>Global Health and Tropical Medicine, Institute of Hygiene and Tropical Medicine, NOVA University of Lisbon, Lisbon, Portugal. <sup>39</sup>TB Competence Centre, Swiss Lung Association, Berne, Switzerland. <sup>40</sup>Dept of Infection, Division of Infection and Immunity, University College London and NIHR Biomedical Research Centre, UCL Hospitals NHS Foundation Trust, London, UK. <sup>41</sup>Saint Camillus International University of Health and Medical Sciences, Rome, Italy. <sup>41</sup>These authors contributed equally. <sup>42</sup>Members of ESGMYC. <sup>43</sup>European Centre for Disease Prevention and Control Public Health Emergency team co-authors.

**Correspondence:** Delia Goletti, Translational Research Unit, Epidemiology and Preclinical Research Dept, "L. Spallanzani" National Institute for Infectious Diseases (INMI), IRCCS, Via Portuense 292, 00149, Rome, Italy. E-mail: delia.goletti@inmi.it

**Correspondence:** Giovanni Battista Migliori, Servizio di Epidemiologia Clinica delle Malattie Respiratorie, Istituti Clinici Scientifici Maugeri IRCCS, Via Roncaccio 16, Tradate, Varese, 21049, Italy. E-mail: giovannibattista.migliori@icsmaugeri.it
